# Supplementary material
Source: PubMed Central journal article supplement (PMC4965585)
Supplement: 10.1074_M115.674598_jbc.M115.674598-1.pdf [file 10.1074_M115.674598_jbc.M115.674598-1.pdf]

## Supplemental Information

**CCAAT/enhancer binding protein  $\alpha$  (C/EBP $\alpha$ ) is important for osteoclast differentiation and activity\***

**Joel Jules<sup>‡</sup>, Wei Chen<sup>‡</sup>, Xu Feng<sup>‡</sup>, and Yi-Ping Li<sup>‡1</sup>**

<sup>‡</sup>From the Department of Pathology, University of Alabama at Birmingham, Birmingham, AL 35294, USA

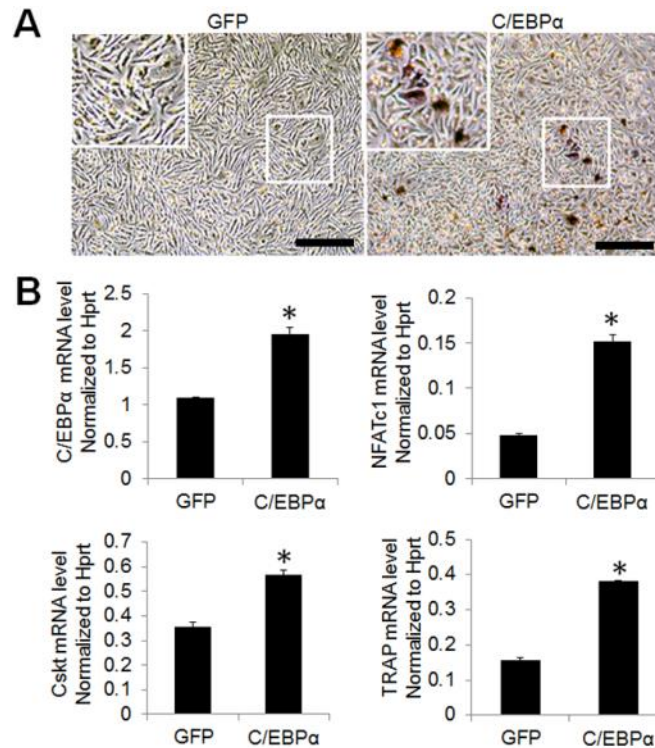

**SUPPLEMENTAL FIGURE 1. C/EBP $\alpha$  overexpression induces OC lineage commitment in the absence of RANKL.** **A**, MBM cells expressing GFP control (GFP) or Flag-C/EBP $\alpha$  (C/EBP $\alpha$ ) were treated with M-CSF (10 ng/ml) alone for 4 days. Cultures from three independent experiments were then stained for TRAP activity. Scale bars are 200  $\mu$ m **B**, MBM cells expressing GFP or C/EBP $\alpha$  were cultured with M-CSF (10 ng/ml) alone for 3 days. Gene expression was assessed by qPCR using Hprt as a loading control in three independent experiments. *Bars* show averages  $\pm$  S.D. \*,  $p < 0.05$ .

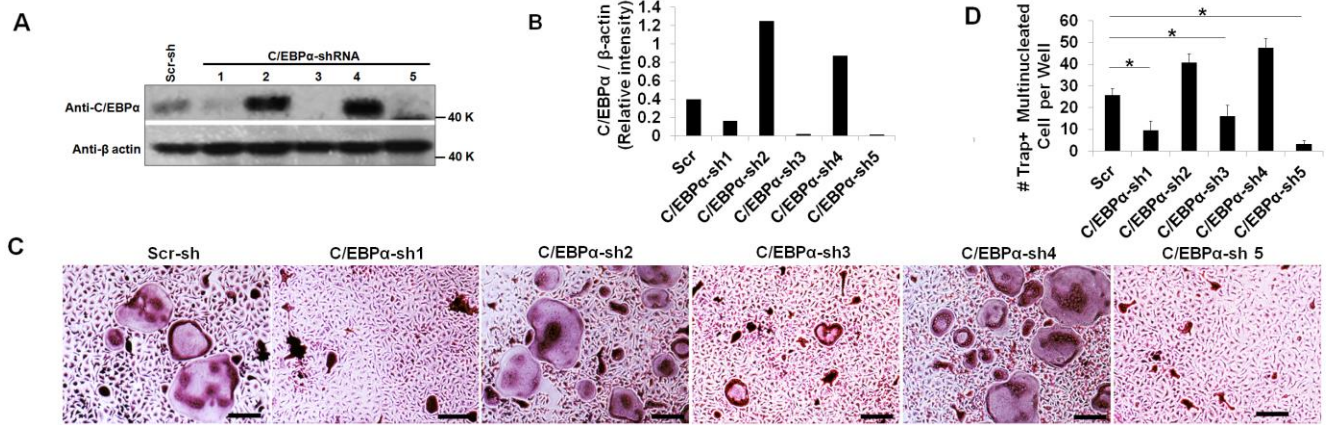

SUPPLEMENTAL FIGURE 2. **C/EBPα silencing inhibits osteoclastogenesis.** *A*, MBM cells expressing Scramble shRNA control (Scr-sh) or various C/EBPα shRNA constructs (C/EBPα-sh 1-5) were treated with M-CSF (10 ng/ml) and RANKL (10 ng/ml) for 48 hours and then submitted to Western blot analysis using β-actin as loading control. *B*, quantification for *A* is shown as relative intensity of C/EBPα expression. *C*, MBM cells expressing Scr-sh or C/EBPα shRNA 1-5 (C/EBPα-sh1-5) were treated with M-CSF (10 ng/ml) plus RANKL (10 ng/ml) for 4 days. All cultures were then stained for TRAP activity. *D*, quantification for *C* is shown from three independent experiments. Scale bars are 200 μm. Bars show averages ± S.D. \*,  $p < 0.05$ .

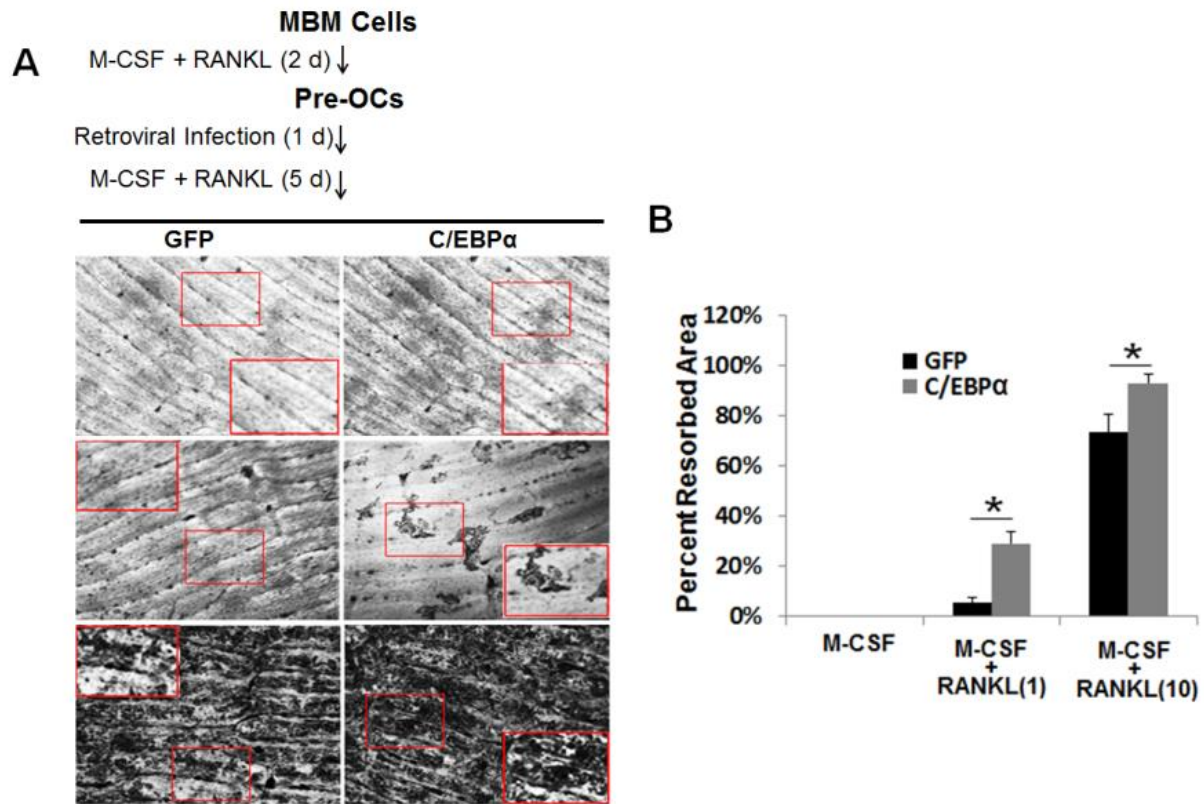

SUPPLEMENTAL FIGURE 3. **C/EBP $\alpha$  overexpression can stimulate bone resorption by OCs from hematoxylin staining of bone slices.** *A*, MBM cells seeded on bone slices were first treated with M-CSF (10 ng/ml) and RANKL (10 ng/ml) for 2 days (d) before infection with retrovirus encoding GFP control (GFP) or Flag-C/EBP $\alpha$  (C/EBP $\alpha$ ) for 1 day. The treatments were then continued for five additional days. The bone slices were stained by hematoxylin for analysis of the resorption pits. *B*, quantification for the bone resorption shown in *A* for three independent experiments. Numbers in parenthesis show concentration in ng/ml. Bars show mean  $\pm$  S.D. \*,  $p < 0.05$ .

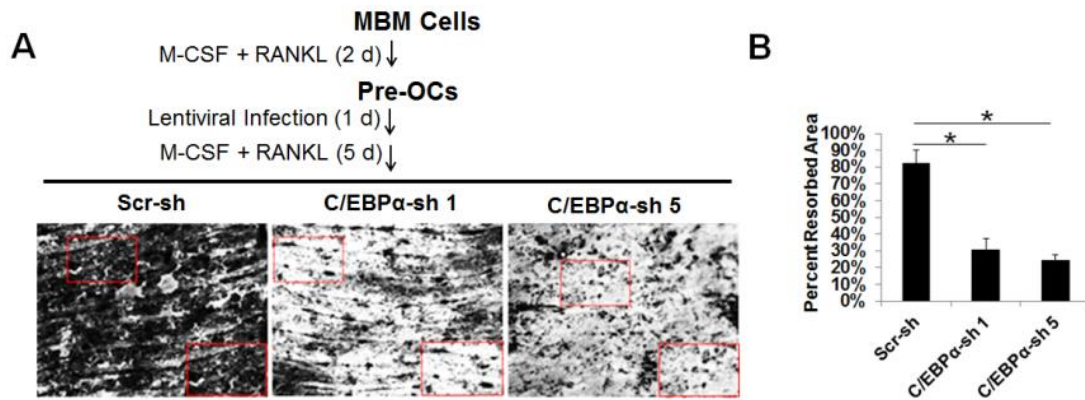

SUPPLEMENTAL FIGURE 4. **C/EBP $\alpha$  silencing abrogates bone resorption by OCs from hematoxylin staining of bone slices.** *A*, MBM cells seeded on bone slices were first treated with M-CSF (10 ng/ml) and RANKL (10 ng/ml) for 2 days (d) before infection with lentivirus encoding Scramble shRNA control (Scr-sh) or C/EBP $\alpha$ -shRNA constructs 1 or 5 (C/EBP $\alpha$ -sh 1 or 5) for 1 day. The treatments were then continued for five additional days. The bone slices were stained by hematoxylin for analysis of the resorption pits. *B*, quantification for the bone resorption shown in *A* from three independent experiments. Numbers in parenthesis show concentration in ng/ml. Bars show mean  $\pm$  S.D. \*,  $p < 0.05$ .
